# Supplementary material for: A joint experimental and theoretical determination of the structure of discharge products in Na–SO2 batteries
Source: Royal Society of Chemistry journal article supplement (doi:10.1039/c6cp04423a), 2016-01-01
Supplement: c6cp04423a1.pdf [file c6cp04423a1.pdf]

## **Electronic Supplementary Information (ESI)**

# **A joint experimental and theoretical determination of the structure of discharge products in Na–SO<sub>2</sub> battery**

Young-Kyu Han,<sup>a,\*</sup> Goojin Jeong,<sup>b</sup> Keon-Joon Lee,<sup>a</sup> Taeun Yim,<sup>b,c,\*</sup> and Young-Jun Kim<sup>b,\*</sup>

<sup>a</sup> Department of Energy and Materials Engineering, Dongguk University-Seoul, Seoul, 04620, Republic of Korea.

<sup>b</sup> Advanced Batteries Research Center, Korea Electronics Technology Institute, Seongnam, 13509, Republic of Korea.

<sup>c</sup> Department of Chemistry, Incheon National University, Incheon, 22012, Republic of Korea.

### **Procedure for a storage test of pristine electrolyte ( $\text{NaAlCl}_4 \cdot x\text{SO}_2$ )**

The electrolyte ( $\text{NaAlCl}_4 \cdot x\text{SO}_2$ ) was prepared by thoroughly mixing sodium chloride ( $\text{NaCl}$ , >99.9%, Alfa Aesar) with aluminum chloride ( $\text{AlCl}_3$ , 99.999%, Alfa Aesar) at a ratio of 1.1 to 1.0 in a homemade glass/Teflon vessel. The vessel was then flushed with  $\text{SO}_2$  gas (Fluka) for two hours until the solid mixtures were fully converted into transparent liquids. In detail, 20.0 g of  $\text{AlCl}_3$  (150.0 mol) and 8.77 g of  $\text{NaCl}$  (150.0 mol) were finely dispersed in the vessel and thereafter excess amounts of  $\text{SO}_2$  gas were blown into the vessel controlled with pressure of 1.5 atm for two hours. After the electrolyte preparation was completed, we calculated the mass of  $\text{SO}_2$  that participated in the formation of the electrolyte complex by weighing the vessel reactor, as shown in the following equation.

$$\text{Used } \text{SO}_2 \text{ mass for electrolyte preparation} = \text{Mass of vessel after reaction } (\text{AlCl}_3 + \text{NaCl} + \text{vessel} + \text{SO}_2) - \text{mass of vessel before reaction } (\text{AlCl}_3 + \text{NaCl} + \text{vessel})$$

It should be noted that there is unreacted gaseous  $\text{SO}_2$  in the vessel even after the reaction was completed because excess amounts of  $\text{SO}_2$  were used for this reaction. Therefore, we bent the electrolyte vessel each day in order to remove unreacted  $\text{SO}_2$  remaining in the vessel and carefully monitored the change of vessel mass. After this repeated process for nine days, we observed that 2.20 mol of  $\text{SO}_2$  was attached on the  $\text{NaAlCl}_4$  complex.

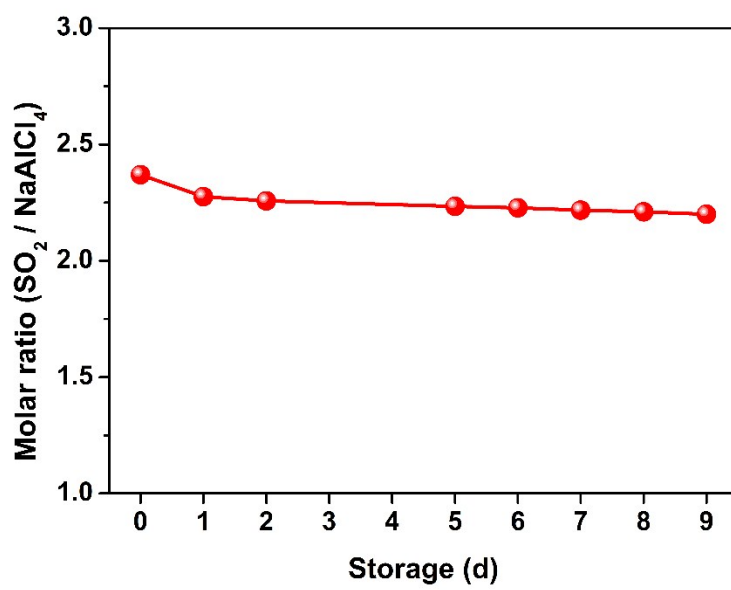

**Figure S1.** Storage tests for pristine electrolyte to determine coordination number of SO<sub>2</sub>.

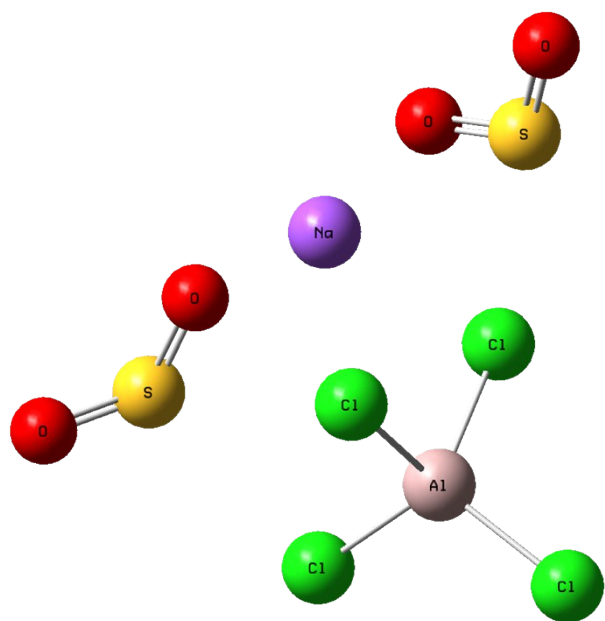

**Figure S2.** Optimized chemical structure of NaAlCl<sub>4</sub>•2SO<sub>2</sub>.
